# Supplementary material for: RETRACTED ARTICLE: Non-invasive vagus nerve stimulation improves clinical and molecular biomarkers of Parkinson’s disease in patients with freezing of gait
Source: PubMed Central journal article supplement (PMC8160211; doi:10.1038/s41531-021-00190-x), 2021-05-27
Supplement: 41531_2021_190_MOESM2_ESM.pdf [file 41531_2021_190_MOESM2_ESM.pdf]

## Reporting Summary

Nature Research wishes to improve the reproducibility of the work that we publish. This form provides structure for consistency and transparency in reporting. For further information on Nature Research policies, see our [Editorial Policies](#) and the [Editorial Policy Checklist](#).

### Statistics

For all statistical analyses, confirm that the following items are present in the figure legend, table legend, main text, or Methods section.

n/a Confirmed

- The exact sample size ( $n$ ) for each experimental group/condition, given as a discrete number and unit of measurement
- A statement on whether measurements were taken from distinct samples or whether the same sample was measured repeatedly
- The statistical test(s) used AND whether they are one- or two-sided  
*Only common tests should be described solely by name; describe more complex techniques in the Methods section.*
- A description of all covariates tested
- A description of any assumptions or corrections, such as tests of normality and adjustment for multiple comparisons
- A full description of the statistical parameters including central tendency (e.g. means) or other basic estimates (e.g. regression coefficient) AND variation (e.g. standard deviation) or associated estimates of uncertainty (e.g. confidence intervals)
- For null hypothesis testing, the test statistic (e.g.  $F$ ,  $t$ ,  $r$ ) with confidence intervals, effect sizes, degrees of freedom and  $P$  value noted  
*Give  $P$  values as exact values whenever suitable.*
- For Bayesian analysis, information on the choice of priors and Markov chain Monte Carlo settings
- For hierarchical and complex designs, identification of the appropriate level for tests and full reporting of outcomes
- Estimates of effect sizes (e.g. Cohen's  $d$ , Pearson's  $r$ ), indicating how they were calculated

*Our web collection on [statistics for biologists](#) contains articles on many of the points above.*

### Software and code

Policy information about [availability of computer code](#)

Data collection NO SOFTWARE WAS USED

Data analysis SPSS VERSION 20

For manuscripts utilizing custom algorithms or software that are central to the research but not yet described in published literature, software must be made available to editors and reviewers. We strongly encourage code deposition in a community repository (e.g. GitHub). See the Nature Research [guidelines for submitting code & software](#) for further information.

### Data

Policy information about [availability of data](#)

All manuscripts must include a [data availability statement](#). This statement should provide the following information, where applicable:

- Accession codes, unique identifiers, or web links for publicly available datasets
- A list of figures that have associated raw data
- A description of any restrictions on data availability

The experimental data are available from the corresponding author, given reasonable requests.

## Field-specific reporting

Please select the one below that is the best fit for your research. If you are not sure, read the appropriate sections before making your selection.

Life sciences  Behavioural & social sciences  Ecological, evolutionary & environmental sciences

For a reference copy of the document with all sections, see [nature.com/documents/nr-reporting-summary-flat.pdf](https://www.nature.com/documents/nr-reporting-summary-flat.pdf)

## Life sciences study design

All studies must disclose on these points even when the disclosure is negative.

|                 |                                                                                                                                                                                                                                                                                                                                                                                                                                                                                                                                                                                                                                                                                                                                                                          |
|-----------------|--------------------------------------------------------------------------------------------------------------------------------------------------------------------------------------------------------------------------------------------------------------------------------------------------------------------------------------------------------------------------------------------------------------------------------------------------------------------------------------------------------------------------------------------------------------------------------------------------------------------------------------------------------------------------------------------------------------------------------------------------------------------------|
| Sample size     | A formal sample size calculation was not performed because we had no prior information regarding the expected treatment effect (and variability) of one month of treatment with nVNS. We recruited patients over a 36-month period.                                                                                                                                                                                                                                                                                                                                                                                                                                                                                                                                      |
| Data exclusions | No data were excluded from the analyses.                                                                                                                                                                                                                                                                                                                                                                                                                                                                                                                                                                                                                                                                                                                                 |
| Replication     | NA                                                                                                                                                                                                                                                                                                                                                                                                                                                                                                                                                                                                                                                                                                                                                                       |
| Randomization   | The devices were dispensed in a randomised and blinded manner. Simple randomisation was performed using a computer-generated list of random numbers to assign either nVNS or sham devices in addition to standard treatment in a 1:1 ratio (Random Allocation version 2.0). Other than the device serial number, nVNS and sham devices were indistinguishable. A complete list of serial numbers and the stimulation mode of each device (sham or active and its serial number) was provided to the unblinded trial oversight committee (not involved in patient recruitment or assessment) by the commercial sponsor (electroCore, Inc.). Investigators, site coordinators and participants were blind to the allocation of devices until the trial had been completed. |
| Blinding        | Investigators, site coordinators and participants were blind to the allocation of devices until the trial had been completed.                                                                                                                                                                                                                                                                                                                                                                                                                                                                                                                                                                                                                                            |

## Reporting for specific materials, systems and methods

We require information from authors about some types of materials, experimental systems and methods used in many studies. Here, indicate whether each material, system or method listed is relevant to your study. If you are not sure if a list item applies to your research, read the appropriate section before selecting a response.

### Materials & experimental systems

| n/a                                 | Involved in the study                                           |
|-------------------------------------|-----------------------------------------------------------------|
| <input checked="" type="checkbox"/> | <input type="checkbox"/> Antibodies                             |
| <input checked="" type="checkbox"/> | <input type="checkbox"/> Eukaryotic cell lines                  |
| <input checked="" type="checkbox"/> | <input type="checkbox"/> Palaeontology and archaeology          |
| <input checked="" type="checkbox"/> | <input type="checkbox"/> Animals and other organisms            |
| <input type="checkbox"/>            | <input checked="" type="checkbox"/> Human research participants |
| <input type="checkbox"/>            | <input checked="" type="checkbox"/> Clinical data               |
| <input checked="" type="checkbox"/> | <input type="checkbox"/> Dual use research of concern           |

### Methods

| n/a                                 | Involved in the study                           |
|-------------------------------------|-------------------------------------------------|
| <input checked="" type="checkbox"/> | <input type="checkbox"/> ChIP-seq               |
| <input checked="" type="checkbox"/> | <input type="checkbox"/> Flow cytometry         |
| <input checked="" type="checkbox"/> | <input type="checkbox"/> MRI-based neuroimaging |

## Human research participants

Policy information about [studies involving human research participants](#)

### Population characteristics

PD patients of both sexes with freezing of gait, aged 30-80 years, were recruited consecutively from the movement disorders outpatient clinic at a tertiary care hospital in Eastern India. Only patients who could walk independently and continuously for at least 30 metres without support, and with the ability to turn 180° on the spot, were included in the study. Patients were diagnosed according to UK Brain Bank Criteria and those with baseline scores  $\geq 2$  on both items 2.13 and 3.11 (specific to freezing of gait on the MDS-UPDRS rating scale) were included. We were careful to exclude patients with early signs of atypical Parkinsonism e.g. supranuclear gaze palsy. Patients with significant visual impairment or coexisting local or systemic diseases (e.g. osteoarthritis or other neurological conditions) likely to affect gait were excluded from our study. Patients who underwent deep brain stimulation surgery or those with an implanted cardiac pacemaker were also excluded to ensure the safe use of nVNS, as were patients with metallic implants near the stimulation site (e.g. fusion of cervical vertebrae). Finally, patients with known or suspected cardiovascular disease, uncontrolled hypertension or recent myocardial infarction were also excluded from the study.

### Recruitment

PD patients were recruited consecutively from the movement disorders outpatient clinic at a tertiary care hospital in Eastern India. Only patients who could walk independently and continuously for at least 30 metres without support, and with the ability to turn 180° on the spot, were included in the study.

## Ethics oversight

Protocols and procedures were approved by the Institutional Institute of Neurosciences Kolkata Ethics Committee (reference number I-NK/EComm/44/2016), dated 2nd April 2016

Note that full information on the approval of the study protocol must also be provided in the manuscript.

## Clinical data

Policy information about [clinical studies](#)

All manuscripts should comply with the ICMJE [guidelines for publication of clinical research](#) and a completed [CONSORT checklist](#) must be included with all submissions.

Clinical trial registration

Study protocol

Data collection

Outcomes
